# Supplementary material for: Resilience of human gut microbial communities for the long stay with multiple dietary shifts
Source: PubMed Central journal article supplement — Gut. 2018 Nov 12;68(12):2254–5. doi: 10.1136/gutjnl-2018-317298 (PMC6872438; doi:10.1136/gutjnl-2018-317298), 2018-11-12
Supplement: gutjnl-2018-317298supp001.pdf [file gutjnl-2018-317298supp001.pdf]

**Supplementary Table 1. Dietary information of volunteer team before they departure to TAT.** As for different dietaries, the numbers represent the amount of food the host eats: For a specific type of food, "1" represents eating relatively little, "4" represents eating relatively large amount, while "2" and "3" represent amount in between. These dietary information are obtained based on the combination of questionnaire and VT members' self-inspection.

|         | Roughage | Refined grains | Dairy Products | Meat | Pluck | Poultry | Eggs | Fish and Seafood | Pizza | Vegetables | Other vegetables (raw) | Vegetables (practice) | Legumes, nuts and seeds | Potato | Pickled food | Fried food | Salty snack | Fruit | Ice cream and pudding | Sweets and snacks after eating | Sugar candy | ade | Sodas |
|---------|----------|----------------|----------------|------|-------|---------|------|------------------|-------|------------|------------------------|-----------------------|-------------------------|--------|--------------|------------|-------------|-------|-----------------------|--------------------------------|-------------|-----|-------|
| VTC1T1  | 4        | 4              | 1              | 4    | 1     | 3       | 4    | 1                | 1     | 4          | 1                      | 4                     | 2                       | 2      | 1            | 2          | 1           | 1     | 1                     | 1                              | 1           | 1   | 1     |
| VTC1T2  | 4        | 4              | 1              | 4    | 1     | 3       | 4    | 1                | 1     | 4          | 1                      | 4                     | 2                       | 2      | 1            | 2          | 1           | 1     | 1                     | 1                              | 1           | 1   | 1     |
| VTC2T1  | 3        | 3              | 4              | 4    | 2     | 3       | 4    | 3                | 1     | 4          | 3                      | 3                     | 4                       | 3      | 3            | 3          | 3           | 4     | 1                     | 3                              | 1           | 3   | 1     |
| VTC2T2  | 3        | 3              | 4              | 4    | 2     | 3       | 4    | 3                | 1     | 4          | 3                      | 3                     | 4                       | 3      | 3            | 3          | 3           | 4     | 1                     | 3                              | 1           | 3   | 1     |
| VTC3T1  | 3        | 3              | 3              | 4    | 2     | 3       | 4    | 3                | 2     | 4          | 4                      | 4                     | 4                       | 3      | 2            | 3          | 3           | 4     | 3                     | 4                              | 3           | 3   | 3     |
| VTC3T2  | 3        | 3              | 3              | 4    | 2     | 3       | 4    | 3                | 2     | 4          | 4                      | 4                     | 4                       | 3      | 2            | 3          | 3           | 4     | 3                     | 4                              | 3           | 3   | 3     |
| VTC4T1  | 3        | 3              | 3              | 4    | 3     | 3       | 3    | 3                | 3     | 3          | 3                      | 3                     | 3                       | 3      | 2            | 2          | 2           | 4     | 3                     | 3                              | 3           | 3   | 3     |
| VTC4T2  | 3        | 3              | 3              | 4    | 3     | 3       | 3    | 3                | 3     | 3          | 3                      | 3                     | 3                       | 3      | 2            | 2          | 2           | 4     | 3                     | 3                              | 3           | 3   | 3     |
| VTC5T1  | 2        | 4              | 3              | 4    | 2     | 3       | 4    | 3                | 1     | 4          | 4                      | 4                     | 3                       | 3      | 3            | 3          | 3           | 4     | 3                     | 3                              | 2           | 3   | 2     |
| VTC5T2  | 2        | 4              | 3              | 4    | 2     | 3       | 4    | 3                | 1     | 4          | 4                      | 4                     | 3                       | 3      | 3            | 3          | 3           | 4     | 3                     | 3                              | 2           | 3   | 2     |
| VTC6T1  | 3        | 4              | 3              | 4    | 2     | 3       | 3    | 2                | 1     | 4          | 4                      | 4                     | 3                       | 3      | 3            | 3          | 2           | 4     | 1                     | 1                              | 1           | 2   | 3     |
| VTC6T2  | 3        | 4              | 3              | 4    | 2     | 3       | 3    | 2                | 1     | 4          | 4                      | 4                     | 3                       | 3      | 3            | 3          | 2           | 4     | 1                     | 1                              | 1           | 2   | 3     |
| VTC7T1  | 4        | 4              | 1              | 4    | 2     | 1       | 4    | 3                | 1     | 4          | 4                      | 4                     | 4                       | 3      | 3            | 2          | 4           | 4     | 1                     | 2                              | 1           | 1   | 1     |
| VTC7T2  | 4        | 4              | 1              | 4    | 2     | 1       | 4    | 3                | 1     | 4          | 4                      | 4                     | 4                       | 3      | 3            | 2          | 4           | 4     | 1                     | 2                              | 1           | 1   | 1     |
| VTC8T1  | 3        | 4              | 2              | 4    | 1     | 3       | 4    | 2                | 1     | 4          | 3                      | 4                     | 3                       | 3      | 3            | 2          | 2           | 4     | 1                     | 1                              | 1           | 1   | 1     |
| VTC8T2  | 3        | 4              | 2              | 4    | 1     | 3       | 4    | 2                | 1     | 4          | 3                      | 4                     | 3                       | 3      | 3            | 2          | 2           | 4     | 1                     | 1                              | 1           | 1   | 1     |
| VTC9T1  | 1        | 4              | 3              | 3    | 3     | 3       | 3    | 3                | 1     | 4          | 3                      | 3                     | 3                       | 3      | 3            | 3          | 3           | 3     | 1                     | 2                              | 2           | 3   | 3     |
| VTC9T2  | 1        | 4              | 3              | 3    | 3     | 3       | 3    | 3                | 1     | 4          | 3                      | 3                     | 3                       | 3      | 3            | 3          | 3           | 3     | 1                     | 2                              | 2           | 3   | 3     |
| VTC10T1 | 4        | 4              | 1              | 4    | 3     | 3       | 4    | 3                | 1     | 3          | 3                      | 3                     | 2                       | 2      | 3            | 2          | 2           | 2     | 1                     | 1                              | 1           | 1   | 3     |
| VTC10T2 | 4        | 4              | 1              | 4    | 3     | 3       | 4    | 3                | 1     | 3          | 3                      | 3                     | 2                       | 2      | 3            | 2          | 2           | 2     | 1                     | 1                              | 1           | 1   | 3     |
