# Supplementary material for: Resilience of human gut microbial communities for the long stay with multiple dietary shifts
Source: PubMed Central journal article supplement — Gut. 2018 Nov 12;68(12):2254–5. doi: 10.1136/gutjnl-2018-317298 (PMC6872438; doi:10.1136/gutjnl-2018-317298), 2018-11-12
Supplement: gutjnl-2018-317298supp002.pdf [file gutjnl-2018-317298supp002.pdf]

**Supplementary Table 2. Dietary information of volunteer team during they stay in TAT. As to Gender, 1 represents male, while 0 represents female. As for different dietaries, the numbers represent the amount of food the host eats: For a specific type of food, "1" represents eating relatively little, "4" represents eating relatively large amount, while "2" and "3" represent amount in between. These dietary information are obtained based on the combination of questionnaire and VT members' self-inspection.**

|          | Gender | Age | Roughage | Refined grains | Dairy Products | Meat | Pilck | Poultry | Eggs | Fish and Seafood | Pizza | Vegetables | Other vegetables (raw) | Vegetables (practice) | Legumes, nuts and seeds | Potato | Pickled food | Fried food | Salty snack | Fruit | Ice cream and pudding | Sweets and snacks after eating | Sugar candy | ade | Sodas |   |
|----------|--------|-----|----------|----------------|----------------|------|-------|---------|------|------------------|-------|------------|------------------------|-----------------------|-------------------------|--------|--------------|------------|-------------|-------|-----------------------|--------------------------------|-------------|-----|-------|---|
| VTT0711  | 1      | 47  | 1        | 3              | 1              | 4    | 3     | 3       | 3    | 3                | 1     | 3          | 2                      | 3                     | 2                       | 2      | 2            | 1          | 1           | 1     | 1                     | 1                              | 1           | 1   | 1     |   |
| VTT0712  | 1      | 47  | 1        | 3              | 1              | 4    | 3     | 3       | 3    | 3                | 1     | 3          | 2                      | 3                     | 2                       | 2      | 2            | 1          | 1           | 1     | 1                     | 1                              | 1           | 1   | 1     |   |
| VTT0713  | 1      | 47  | 1        | 3              | 1              | 4    | 3     | 3       | 3    | 3                | 1     | 3          | 2                      | 3                     | 2                       | 2      | 2            | 1          | 1           | 1     | 1                     | 1                              | 1           | 1   | 1     |   |
| VTT0714  | 1      | 47  | 1        | 3              | 1              | 4    | 3     | 3       | 3    | 3                | 1     | 3          | 2                      | 3                     | 2                       | 2      | 2            | 1          | 1           | 1     | 1                     | 1                              | 1           | 1   | 1     |   |
| VTT0715  | 1      | 47  | 1        | 3              | 1              | 4    | 3     | 3       | 3    | 3                | 1     | 3          | 2                      | 3                     | 2                       | 2      | 2            | 1          | 1           | 1     | 1                     | 1                              | 1           | 1   | 1     |   |
| VTT0716  | 1      | 47  | 1        | 3              | 1              | 4    | 3     | 3       | 3    | 3                | 1     | 3          | 2                      | 3                     | 2                       | 2      | 2            | 1          | 1           | 1     | 1                     | 1                              | 1           | 1   | 1     |   |
| VTT0717  | 1      | 47  | 1        | 3              | 1              | 4    | 3     | 3       | 3    | 3                | 1     | 3          | 2                      | 3                     | 2                       | 2      | 2            | 1          | 1           | 1     | 1                     | 1                              | 1           | 1   | 1     |   |
| VTT0718  | 1      | 47  | 1        | 3              | 1              | 4    | 3     | 3       | 3    | 3                | 1     | 3          | 2                      | 3                     | 2                       | 2      | 2            | 1          | 1           | 1     | 1                     | 1                              | 1           | 1   | 1     |   |
| VTT0719  | 1      | 47  | 1        | 3              | 1              | 4    | 3     | 3       | 3    | 3                | 1     | 3          | 2                      | 3                     | 2                       | 2      | 2            | 1          | 1           | 1     | 1                     | 1                              | 1           | 1   | 1     |   |
| VTT1111  | 1      | 52  | 1        | 4              | 1              | 4    | 1     | 1       | 1    | 2                | 1     | 3          | 1                      | 1                     | 1                       | 1      | 1            | 3          | 1           | 4     | 1                     | 1                              | 1           | 4   | 1     |   |
| VTT1112  | 1      | 52  | 1        | 4              | 1              | 4    | 1     | 1       | 1    | 2                | 1     | 3          | 1                      | 1                     | 1                       | 1      | 1            | 3          | 1           | 4     | 1                     | 1                              | 1           | 4   | 1     |   |
| VTT1113  | 1      | 52  | 1        | 4              | 1              | 4    | 1     | 1       | 1    | 2                | 1     | 3          | 1                      | 1                     | 1                       | 1      | 1            | 3          | 1           | 4     | 1                     | 1                              | 1           | 4   | 1     |   |
| VTT1115  | 1      | 52  | 1        | 4              | 1              | 4    | 1     | 1       | 1    | 2                | 1     | 3          | 1                      | 1                     | 1                       | 1      | 1            | 3          | 1           | 4     | 1                     | 1                              | 1           | 4   | 1     |   |
| VTT1117  | 1      | 52  | 1        | 4              | 1              | 4    | 1     | 1       | 1    | 2                | 1     | 3          | 1                      | 1                     | 1                       | 1      | 1            | 3          | 1           | 4     | 1                     | 1                              | 1           | 4   | 1     |   |
| VTT1174  | 1      | 52  | 1        | 4              | 1              | 4    | 1     | 1       | 1    | 2                | 1     | 3          | 1                      | 1                     | 1                       | 1      | 1            | 3          | 1           | 4     | 1                     | 1                              | 1           | 4   | 1     |   |
| VTT1175  | 1      | 52  | 1        | 4              | 1              | 4    | 1     | 1       | 1    | 2                | 1     | 3          | 1                      | 1                     | 1                       | 1      | 1            | 3          | 1           | 4     | 1                     | 1                              | 1           | 4   | 1     |   |
| VTT1178  | 1      | 52  | 1        | 4              | 1              | 4    | 1     | 1       | 1    | 2                | 1     | 3          | 1                      | 1                     | 1                       | 1      | 1            | 3          | 1           | 4     | 1                     | 1                              | 1           | 4   | 1     |   |
| VTT1179  | 1      | 52  | 1        | 4              | 1              | 4    | 1     | 1       | 1    | 2                | 1     | 3          | 1                      | 1                     | 1                       | 1      | 1            | 3          | 1           | 4     | 1                     | 1                              | 1           | 4   | 1     |   |
| VTT2212  | 1      | 44  | 4        | 3              | 4              | 4    | 1     | 3       | 3    | 1                | 4     | 1          | 3                      | 3                     | 3                       | 1      | 3            | 1          | 4           | 2     | 3                     | 1                              | 3           | 3   | 1     |   |
| VTT2213  | 1      | 44  | 4        | 3              | 4              | 4    | 1     | 3       | 3    | 3                | 1     | 4          | 1                      | 3                     | 3                       | 3      | 1            | 3          | 1           | 4     | 2                     | 3                              | 1           | 3   | 1     |   |
| VTT2214  | 1      | 44  | 4        | 3              | 4              | 4    | 1     | 3       | 3    | 3                | 1     | 4          | 1                      | 3                     | 3                       | 3      | 1            | 3          | 1           | 4     | 2                     | 3                              | 1           | 3   | 1     |   |
| VTT2215  | 1      | 44  | 4        | 3              | 4              | 4    | 1     | 3       | 3    | 3                | 1     | 4          | 1                      | 3                     | 3                       | 3      | 1            | 3          | 1           | 4     | 2                     | 3                              | 1           | 3   | 1     |   |
| VTT2217  | 1      | 44  | 4        | 3              | 4              | 4    | 1     | 3       | 3    | 3                | 1     | 4          | 1                      | 3                     | 3                       | 3      | 1            | 3          | 1           | 4     | 2                     | 3                              | 1           | 3   | 1     |   |
| VTT2218  | 1      | 44  | 4        | 3              | 4              | 4    | 1     | 3       | 3    | 3                | 1     | 4          | 1                      | 3                     | 3                       | 3      | 1            | 3          | 1           | 4     | 2                     | 3                              | 1           | 3   | 1     |   |
| VTT2219  | 1      | 44  | 4        | 3              | 4              | 4    | 1     | 3       | 3    | 3                | 1     | 4          | 1                      | 3                     | 3                       | 3      | 1            | 3          | 1           | 4     | 2                     | 3                              | 1           | 3   | 1     |   |
| VTT2274  | 1      | 44  | 4        | 3              | 4              | 4    | 1     | 3       | 3    | 3                | 1     | 4          | 1                      | 3                     | 3                       | 3      | 1            | 3          | 1           | 4     | 2                     | 3                              | 1           | 3   | 1     |   |
| VTT2275  | 1      | 44  | 4        | 3              | 4              | 4    | 1     | 3       | 3    | 3                | 1     | 4          | 1                      | 3                     | 3                       | 3      | 1            | 3          | 1           | 4     | 2                     | 3                              | 1           | 3   | 1     |   |
| VTT2277  | 1      | 44  | 4        | 3              | 4              | 4    | 1     | 3       | 3    | 3                | 1     | 4          | 1                      | 3                     | 3                       | 3      | 1            | 3          | 1           | 4     | 2                     | 3                              | 1           | 3   | 1     |   |
| VTT2279  | 1      | 44  | 4        | 3              | 4              | 4    | 1     | 3       | 3    | 3                | 1     | 4          | 1                      | 3                     | 3                       | 3      | 1            | 3          | 1           | 4     | 2                     | 3                              | 1           | 3   | 1     |   |
| VTT3311  | 0      | 44  | 3        | 4              | 4              | 4    | 3     | 3       | 4    | 3                | 2     | 4          | 4                      | 4                     | 4                       | 4      | 3            | 2          | 3           | 2     | 4                     | 3                              | 4           | 3   | 3     | 3 |
| VTT3312  | 0      | 44  | 3        | 4              | 4              | 4    | 3     | 3       | 4    | 3                | 2     | 4          | 4                      | 4                     | 4                       | 4      | 3            | 2          | 3           | 2     | 4                     | 3                              | 4           | 3   | 3     | 3 |
| VTT3313  | 0      | 44  | 3        | 4              | 4              | 4    | 3     | 3       | 4    | 3                | 2     | 4          | 4                      | 4                     | 4                       | 4      | 3            | 2          | 3           | 2     | 4                     | 3                              | 4           | 3   | 3     | 3 |
| VTT3314  | 0      | 44  | 3        | 4              | 4              | 4    | 3     | 3       | 4    | 3                | 2     | 4          | 4                      | 4                     | 4                       | 4      | 3            | 2          | 3           | 2     | 4                     | 3                              | 4           | 3   | 3     | 3 |
| VTT3315  | 0      | 44  | 3        | 4              | 4              | 4    | 3     | 3       | 4    | 3                | 2     | 4          | 4                      | 4                     | 4                       | 4      | 3            | 2          | 3           | 2     | 4                     | 3                              | 4           | 3   | 3     | 3 |
| VTT3317  | 0      | 44  | 3        | 4              | 4              | 4    | 3     | 3       | 4    | 3                | 2     | 4          | 4                      | 4                     | 4                       | 4      | 3            | 2          | 3           | 2     | 4                     | 3                              | 4           | 3   | 3     | 3 |
| VTT3318  | 0      | 44  | 3        | 4              | 4              | 4    | 3     | 3       | 4    | 3                | 2     | 4          | 4                      | 4                     | 4                       | 4      | 3            | 2          | 3           | 2     | 4                     | 3                              | 4           | 3   | 3     | 3 |
| VTT3319  | 0      | 44  | 3        | 4              | 4              | 4    | 3     | 3       | 4    | 3                | 2     | 4          | 4                      | 4                     | 4                       | 4      | 3            | 2          | 3           | 2     | 4                     | 3                              | 4           | 3   | 3     | 3 |
| VTT3374  | 0      | 44  | 3        | 4              | 4              | 4    | 3     | 3       | 4    | 3                | 2     | 4          | 4                      | 4                     | 4                       | 4      | 3            | 2          | 3           | 2     | 4                     | 3                              | 4           | 3   | 3     | 3 |
| VTT3375a | 0      | 44  | 3        | 4              | 4              | 4    | 3     | 3       | 4    | 3                | 2     | 4          | 4                      | 4                     | 4                       | 4      | 3            | 2          | 3           | 2     | 4                     | 3                              | 4           | 3   | 3     | 3 |
| VTT3375b | 0      | 44  | 3        | 4              | 4              | 4    | 3     | 3       | 4    | 3                | 2     | 4          | 4                      | 4                     | 4                       | 4      | 3            | 2          | 3           | 2     | 4                     | 3                              | 4           | 3   | 3     | 3 |
| VTT3377  | 0      | 44  | 3        | 4              | 4              | 4    | 3     | 3       | 4    | 3                | 2     | 4          | 4                      | 4                     | 4                       | 4      | 3            | 2          | 3           | 2     | 4                     | 3                              | 4           | 3   | 3     | 3 |
| VTT3379  | 0      | 44  | 3        | 4              | 4              | 4    | 3     | 3       | 4    | 3                | 2     | 4          | 4                      | 4                     | 4                       | 4      | 3            | 2          | 3           | 2     | 4                     | 3                              | 4           | 3   | 3     | 3 |
| VTT4412a | 1      | 38  | 3        | 3              | 4              | 2    | 4     | 3       | 4    | 3                | 2     | 4          | 3                      | 3                     | 3                       | 3      | 3            | 3          | 2           | 4     | 3                     | 3                              | 3           | 3   | 3     | 3 |
| VTT4412b | 1      | 38  | 3        | 3              | 4              | 2    | 4     | 3       | 4    | 3                | 2     | 4          | 3                      | 3                     | 3                       | 3      | 3            | 3          | 2           | 4     | 3                     | 3                              | 3           | 3   | 3     | 3 |
| VTT4414  | 1      | 38  | 3        | 3              | 4              | 2    | 4     | 3       | 4    | 3                | 2     | 4          | 3                      | 3                     | 3                       | 3      | 3            | 3          | 2           | 4     | 3                     | 3                              | 3           | 3   | 3     | 3 |
| VTT4417  | 1      | 38  | 3        | 3              | 4              | 2    | 4     | 3       | 4    | 3                | 2     | 4          | 3                      | 3                     | 3                       | 3      | 3            | 3          | 2           | 4     | 3                     | 3                              | 3           | 3   | 3     | 3 |
| VTT449a  | 1      | 38  | 3        | 3              | 4              | 2    | 4     | 3       | 4    | 3                | 2     | 4          | 3                      | 3                     | 3                       | 3      | 3            | 3          | 2           | 4     | 3                     | 3                              | 3           | 3   | 3     | 3 |
| VTT4496  | 1      | 38  | 3        | 3              | 4              | 2    | 4     | 3       | 4    | 3                | 2     | 4          | 3                      | 3                     | 3                       | 3      | 3            | 3          | 2           | 4     | 3                     | 3                              | 3           | 3   | 3     | 3 |
| VTT5511  | 1      | 44  | 3        | 4              | 2              | 4    | 3     | 3       | 4    | 4                | 1     | 4          | 4                      | 4                     | 4                       | 3      | 2            | 4          | 3           | 3     | 4                     | 2                              | 2           | 2   | 2     | 2 |
| VTT5512  | 1      | 44  | 3        | 4              | 2              | 4    | 3     | 3       | 4    | 4                | 1     | 4          | 4                      | 4                     | 4                       | 3      | 2            | 4          | 3           | 3     | 4                     | 2                              | 2           | 2   | 2     | 2 |
| VTT5513  | 1      | 44  | 3        | 4              | 2              | 4    | 3     | 3       | 4    | 4                | 1     | 4          | 4                      | 4                     | 4                       | 3      | 2            | 4          | 3           | 3     | 4                     | 2                              | 2           | 2   | 2     | 2 |
| VTT5514  | 1      | 44  | 3        | 4              | 2              | 4    | 3     | 3       | 4    | 4                | 1     | 4          | 4                      | 4                     | 4                       | 3      | 2            | 4          | 3           | 3     | 4                     | 2                              | 2           | 2   | 2     | 2 |
| VTT5515  | 1      | 44  | 3        | 4              | 2              | 4    | 3     | 3       | 4    | 4                | 1     | 4          | 4                      | 4                     | 4                       | 3      | 2            | 4          | 3           | 3     | 4                     | 2                              | 2           | 2   | 2     | 2 |
| VTT5517  | 1      | 44  | 3        | 4              | 2              | 4    | 3     | 3       | 4    | 4                | 1     | 4          | 4                      | 4                     | 4                       | 3      | 2            | 4          | 3           | 3     | 4                     | 2                              | 2           | 2   | 2     | 2 |
| VTT5518  | 1      | 44  | 3        | 4              | 2              | 4    | 3     | 3       | 4    | 4                | 1     | 4          | 4                      | 4                     | 4                       | 3      | 2            | 4          | 3           | 3     | 4                     | 2                              | 2           | 2   | 2     | 2 |
| VTT5519  | 1      | 44  | 3        | 4              | 2              | 4    | 3     | 3       | 4    | 4                | 1     | 4          | 4                      | 4                     | 4                       | 3      | 2            | 4          | 3           | 3     | 4                     | 2                              | 2           | 2   | 2     | 2 |
| VTT5574  | 1      | 44  | 3        | 4              | 2              | 4    | 3     | 3       | 4    | 4                | 1     | 4          | 4                      | 4                     | 4                       | 3      | 2            | 4          | 3           | 3     | 4                     | 2                              | 2           | 2   | 2     | 2 |
| VTT5576  | 1      | 44  | 3        | 4              | 2              | 4    | 3     | 3       | 4    | 4                | 1     | 4          | 4                      | 4                     | 4                       | 3      | 2            | 4          | 3           | 3     | 4                     | 2                              | 2           | 2   | 2     | 2 |
| VTT5577  | 1      | 44  | 3        | 4              | 2              | 4    | 3     | 3       | 4    | 4                | 1     | 4          | 4                      | 4                     | 4                       | 3      | 2            | 4          | 3           | 3     | 4                     | 2                              | 2           | 2   | 2     | 2 |
| VTT5579  | 1      | 44  | 3        | 4              | 2              | 4    | 3     | 3       | 4    | 4                | 1     | 4          | 4                      | 4                     | 4                       | 3      | 2            | 4          | 3           | 3     | 4                     | 2                              | 2           | 2   | 2     | 2 |
| VTT6671  | 0      | 45  | 3        | 4              | 4              | 4    | 3     | 3       | 4    | 3                | 2     | 4          | 4                      | 4                     | 4                       | 4      | 3            | 2          | 3           | 2     | 4                     | 3                              | 4           | 3   | 3     | 3 |
| VTT6672  | 0      | 45  | 3        | 4              | 4              | 4    | 3     | 3       | 4    | 3                | 2     | 4          | 4                      | 4                     | 4                       | 4      | 3            | 2          | 3           | 2     | 4                     | 3                              | 4           | 3   | 3     | 3 |
| VTT6673  | 0      | 45  | 3        | 4              | 4              | 4    | 3     | 3       | 4    | 3                | 2     | 4          | 4                      | 4                     | 4                       | 4      | 3            | 2          | 3           | 2     | 4                     | 3                              | 4           | 3   | 3     | 3 |
| VTT6674  | 0      | 45  | 3        | 4              | 4              | 4    | 3     | 3       | 4    | 3                | 2     | 4          | 4                      | 4                     | 4                       | 4      | 3            | 2          | 3           | 2     | 4                     | 3                              | 4           | 3   | 3     | 3 |
| VTT6675  | 0      | 45  | 3        | 4              | 4              | 4    | 3     | 3       | 4    | 3                | 2     | 4          | 4                      | 4                     | 4                       | 4      | 3            | 2          | 3           | 2     | 4                     | 3                              | 4           | 3   | 3     | 3 |
| VTT6677  | 0      | 45  | 3        | 4              | 4              | 4    | 3     | 3       | 4    | 3                | 2     | 4          | 4                      | 4                     | 4                       | 4      | 3            | 2          | 3           | 2     | 4                     | 3                              | 4           | 3   | 3     | 3 |
| VTT6678  | 0      | 45  | 3        | 4              | 4              | 4    | 3     | 3       | 4    | 3                | 2     | 4          | 4                      | 4                     | 4                       | 4      | 3            | 2          | 3           | 2     | 4                     | 3                              | 4           | 3   | 3     | 3 |
| VTT6679  | 0      | 45  | 3        | 4              | 4              | 4    | 3     | 3       | 4    | 3                | 2     | 4          | 4                      | 4                     | 4                       | 4      | 3            | 2          | 3           | 2     | 4                     | 3                              | 4           | 3   | 3     | 3 |
| VTT7710  | 0      | 40  | 3        | 3              | 1              | 4    | 3     | 2       | 4    | 2                | 1     | 3          | 3                      | 4                     | 3                       | 3      | 2            | 2          | 2           | 4     | 2                     | 4                              | 2           | 1   | 1     | 1 |
| VTT7712  | 0      | 40  | 3        | 3              | 1              | 4    | 3     | 2       | 4    | 2                | 1     | 3          | 3                      | 4                     | 3                       | 3      | 2            | 2          | 2           | 4     | 2                     | 4                              | 2           | 1   | 1     | 1 |
| VTT7713  | 0      | 40  | 3        | 3              | 1              | 4    | 3     | 2       | 4    | 2                | 1     | 3          | 3                      | 4                     | 3                       |        |              |            |             |       |                       |                                |             |     |       |   |
