# Supplementary material for: Resilience of human gut microbial communities for the long stay with multiple dietary shifts
Source: PubMed Central journal article supplement — Gut. 2018 Nov 12;68(12):2254–5. doi: 10.1136/gutjnl-2018-317298 (PMC6872438; doi:10.1136/gutjnl-2018-317298), 2018-11-12
Supplement: gutjnl-2018-317298supp003.pdf [file gutjnl-2018-317298supp003.pdf]

**Supplementary Table 3. The r value and p value of Mantel's test between the taxonomic composition data and dietary information for Chinese volunteer team during period from phase T2 to T4.**

| Taxonomic structure   | Dietary                        | r        | p        |
|-----------------------|--------------------------------|----------|----------|
| Taxonomic composition | Roughage                       | 0.023532 | 0.3314   |
| Taxonomic composition | Refined grains                 | 0.04385  | 0.0055   |
| Taxonomic composition | Dairy Products                 | 0.074382 | 1.00E-04 |
| Taxonomic composition | Meat                           | 0.163909 | 0.0054   |
| Taxonomic composition | Pluck                          | 0.062726 | 0.1233   |
| Taxonomic composition | Poultry                        | 0.002623 | 0.4612   |
| Taxonomic composition | Eggs                           | 0.033593 | 0.2734   |
| Taxonomic composition | Fish and Seafood               | 0.22635  | 1.00E-04 |
| Taxonomic composition | Pizza                          | 0.034819 | 0.0569   |
| Taxonomic composition | Vegetables                     | 0.106152 | 5.00E-04 |
| Taxonomic composition | Other (vegetables and raw)     | 0.072318 | 0.024    |
| Taxonomic composition | Vegetables (practice)          | 0.034191 | 0.2718   |
| Taxonomic composition | Legumes (nuts and seeds)       | 0.124824 | 0.0073   |
| Taxonomic composition | Potato                         | 0.047619 | 0.1972   |
| Taxonomic composition | Pickled food                   | 0.211387 | 1.00E-04 |
| Taxonomic composition | Fried food                     | 0.020994 | 0.311    |
| Taxonomic composition | Salty snack                    | 0.141573 | 4.00E-04 |
| Taxonomic composition | Fruit                          | 0.055477 | 0.1854   |
| Taxonomic composition | Ice cream and pudding          | 0.062705 | 0.0354   |
| Taxonomic composition | Sweets and snacks after eating | 0.093965 | 1.00E-04 |
| Taxonomic composition | Sugar candy                    | 0.030778 | 0.0766   |
| Taxonomic composition | ade                            | 0.022969 | 0.3222   |
| Taxonomic composition | Sodas                          | 0.063042 | 2.00E-04 |
