# Supplementary material for: Resilience of human gut microbial communities for the long stay with multiple dietary shifts
Source: PubMed Central journal article supplement — Gut. 2018 Nov 12;68(12):2254–5. doi: 10.1136/gutjnl-2018-317298 (PMC6872438; doi:10.1136/gutjnl-2018-317298), 2018-11-12
Supplement: gutjnl-2018-317298supp004.pdf [file gutjnl-2018-317298supp004.pdf]

**Supplementary Table 4. The r value and p value of Mantel's test between the functional composition data and dietary information for Chinese volunteer team during period from phase T2 to T4.**

| Function structure   | Dieraty                        | r         | p        |
|----------------------|--------------------------------|-----------|----------|
| Function composition | Roughage                       | 0.074714  | 0.062    |
| Function composition | Refined.grains                 | 0.020535  | 0.0747   |
| Function composition | Dairy Products                 | 0.064669  | 5.00E-04 |
| Function composition | Meat                           | -0.01902  | 0.6264   |
| Function composition | Pluck                          | 0.008658  | 0.41     |
| Function composition | Poultry                        | -0.044923 | 0.8018   |
| Function composition | Eggs                           | -0.008171 | 0.5509   |
| Function composition | Fish and Seafood               | 0.112862  | 0.0053   |
| Function composition | Pizza                          | 0.035269  | 0.0421   |
| Function composition | Vegetables                     | 0.072961  | 0.0042   |
| Function composition | Other (vegetables and raw)     | 0.091096  | 0.0029   |
| Function composition | Vegetables (practice)          | -0.020594 | 0.649    |
| Function composition | Legumes (nuts and seed)        | 0.072742  | 0.0449   |
| Function composition | Potato                         | 0.020788  | 0.3302   |
| Function composition | Pickled food                   | 0.145515  | 7.00E-04 |
| Function composition | Fried food                     | -0.013411 | 0.615    |
| Function composition | Salty snack                    | 0.119148  | 5.00E-04 |
| Function composition | Fruit                          | 0.04157   | 0.2117   |
| Function composition | Ice cream and pudding          | 0.060222  | 0.0238   |
| Function composition | Sweets and snacks after eating | 0.046798  | 0.014    |
| Function composition | Sugar candy                    | 0.033268  | 0.0494   |
| Function composition | ade                            | 0.034421  | 0.2045   |
| Function composition | Sodas                          | 0.069923  | 1.00E-04 |
